# Supplementary material for: Are self-directed parenting interventions sufficient for externalising behaviour problems in childhood? A systematic review and meta-analysis
Source: Springer Nature journal article supplement (doi:10.1007/s00787-014-0556-5), 2014-05-19
Supplement: MOESM1 [file 8685020]

Appendix 1 Search strategy

All searches conducted on 13th May 2013

CENTRAL search

#1 attention deficit hyperactivity disorder

#2 disruptive behaviour disorder

#3 conduct disorder

#4 oppositional defiant disorder

#5 externalising behaviour

#6 self-administered

#7 self-directed

#8 self-help

#9 parent-administered

#10 bibliotherapy

#11 internet

#12 #1 and #6

#13 #1 and #7

#14 #1 and #8

#15 #1 and #9

#16 #1 and #10

#17 #1 and #11

#18 #2 and #6

#19 #2 and #7

#20 #2 and #8

#21 #2 and #9

#22 #2 and #10

#23 #2 and #11

#24 #3 and #6

#25 #3 and #7

#26 #3 and #8

#27 #3 and #9

#28 #3 and #10

#29 #3 and #11

#30 #4 and #6

#31 #4 and #7

#32 #4 and #8

#33 #4 and #9

#34 #4 and #10

#35 #4 and #11

#36 #5 and #6

#37 #5 and #7

#38 #5 and #8

#39 #5 and #9

#40 #5 and #10

#41 #5 and #11

#42 #12 or #13 or #14 or #15 or #16 or #17 or #18 or #19 or #20 or #21 or #22 or #23 or #24 or #25 or #26 or #27 or #28 or #29 or #30 or #31 or #32 or #33 or #34 or #35 or #36 or #37 or #38 or #39 or #40 or #4

PubMed, Embase and Psychinfo Search

**(((attention deficit hyperactivity disorder[MeSH Terms]) AND self-administered[Title/Abstract])) OR ((disruptive behavior disorder[MeSH Terms]) AND self-administered)) OR ((conduct disorder[MeSH Terms]) AND self-administered)) OR ((oppositional defiant disorder[MeSH Terms]) AND self-administered)) OR ((attention deficit hyperactivity disorder[MeSH Terms]) AND self-directed)) OR ((disruptive behavior disorder[MeSH Terms]) AND self-directed)) OR ((conduct disorder) AND self-directed)) OR ((oppositional defiant disorder[MeSH Terms]) AND self-directed)) OR ((attention deficit hyperactivity disorder[MeSH Terms]) AND self-help)) OR ((disruptive behavior disorder[MeSH Terms]) AND self-help)) OR ((conduct disorder[MeSH Terms]) AND self-help)) OR ((oppositional defiant disorder[MeSH Terms]) AND self-help)) OR ((attention deficit hyperactivity disorder[MeSH Terms]) AND parent-administered)) OR ((disruptive behavior disorder[MeSH Terms]) AND parent-administered)) OR ((conduct disorder[MeSH Terms]) AND parent-administered)) OR ((oppositional defiant disorder[MeSH Terms]) AND parent-administered)) OR ((externalising behaviour) AND parent-administered)) OR ((attention deficit hyperactivity disorder[MeSH Terms]) AND bibliotherapy)) OR ((disruptive behavior disorder[MeSH Terms]) AND bibliotherapy)) OR ((conduct disorder[MeSH Terms]) AND bibliotherapy)) OR ((oppositional defiant disorder[MeSH Terms]) AND bibliotherapy)) OR ((attention deficit hyperactivity disorder[MeSH Terms]) AND internet)) OR ((disruptive behavior disorder[MeSH Terms]) AND internet)) OR ((conduct disorder[MeSH Terms]) AND internet)) OR ((oppositional defiant disorder[MeSH Terms]) AND internet))) OR ((attention deficit hyperactivity disorder) AND self-administered)) OR ((disruptive behaviour disorder) AND self-administered)) OR ((conduct disorder) AND self-administered)) OR ((oppositional defiant disorder) AND self-administered)) OR ((attention deficit hyperactivity disorder) AND self-directed)) OR ((disruptive behaviour disorder) AND self-directed)) OR ((oppositional defiant disorder) AND self-directed)) OR ((attention deficit hyperactivity disorder) AND self-help)) OR ((disruptive behaviour disorder) AND self-help)) OR ((conduct disorder) AND self-help)) OR ((oppositional defiant disorder) AND self-help)) OR ((attention deficit hyperactivity disorder) AND parent-administered)) OR ((disruptive behaviour disorder) AND parent-administered)) OR ((conduct disorder) AND parent-administered)) OR ((oppositional defiant disorder) AND parent-administered)) OR ((disruptive behaviour disorder) AND bibliotherapy)) OR ((attention deficit hyperactivity disorder) AND bibliotherapy)) OR ((conduct disorder) AND bibliotherapy)) OR ((oppositional defiant disorder) AND bibliotherapy)) OR ((attention deficit hyperactivity disorder) AND internet)) OR ((disruptive behaviour disorder) AND internet)) OR ((conduct disorder) AND internet)) OR ((oppositional defiant disorder) AND internet))) OR ((externalizing behaviour) AND self-administered)) OR ((externalizing behaviour) AND self-directed)) OR ((externalizing behaviour) AND self-help)) OR ((externalizing behaviour) AND parent-administered)) OR ((externalizing behaviour) AND bibliotherapy)) OR ((externalizing behaviour) AND internet)**

**Web of Knowledge**

| #35 | #32 OR #31 OR #30 OR #29 OR #28 OR #27 OR #26 OR #25 OR #24 OR #23 OR #22 OR #21 OR #20 OR #19 OR #18 OR #17 OR #16 OR #15 OR #14 OR #13 OR #12 OR #11 OR #10 OR #9 OR #8 OR #7 OR #6 OR #5 OR #4 OR #3 OR #2 OR #1 Refined by: Document Types=(CLINICAL TRIAL)  *DocType=All document types; Language=All languages;* |
| --- | --- |
| #34 | #32 OR #31 OR #30 OR #29 OR #28 OR #27 OR #26 OR #25 OR #24 OR #23 OR #22 OR #21 OR #20 OR #19 OR #18 OR #17 OR #16 OR #15 OR #14 OR #13 OR #12 OR #11 OR #10 OR #9 OR #8 OR #7 OR #6 OR #5 OR #4 OR #3 OR #2 OR #1  *DocType=All document types; Language=All languages;* |
| #33 | #32 AND #31 AND #30 AND #29 AND #28 AND #27 AND #26 AND #25 AND #24 AND #23 AND #22 AND #21 AND #20 AND #19 AND #18 AND #17 AND #16 AND #15 AND #14 AND #13 AND #12 AND #11 AND #10 AND #9 AND #8 AND #7 AND #6 AND #5 AND #4 AND #3 AND #1  *DocType=All document types; Language=All languages;* |
| #32 | Topic=(externalizing behaviour) AND Topic=(internet)  *DocType=All document types; Language=All languages;* |
| #31 | Topic=(externalizing behaviour) AND Topic=(bibliotherapy)  *DocType=All document types; Language=All languages;* |
| #30 | Topic=(externalizing behaviour) AND Topic=(parent-administered)  *DocType=All document types; Language=All languages;* |
| #29 | Topic=(externalizing behaviour) AND Topic=(self-help)  *DocType=All document types; Language=All languages;* |
| #28 | Topic=(externalizing behaviour) AND Topic=(self-directed)  *DocType=All document types; Language=All languages;* |
| #27 | Topic=(externalizing behaviour) AND Topic=(self-administered)  *DocType=All document types; Language=All languages;* |
| #26 | Topic=(oppositional defiant disorder) AND Topic=(internet)  *DocType=All document types; Language=All languages;* |
| #25 | Topic=(oppositional defiant disorder) AND Topic=(internet)  *DocType=All document types; Language=All languages;* |
| #24 | Topic=(oppositional defiant disorder) AND Topic=(bibliotherapy)  *DocType=All document types; Language=All languages;* |
| #23 | Topic=(oppositional defiant disorder) AND Topic=(parent-administered)  *DocType=All document types; Language=All languages;* |
| #22 | Topic=(oppositional defiant disorder) AND Topic=(self-help)  *DocType=All document types; Language=All languages;* |
| #21 | Topic=(oppositional defiant disorder) AND Topic=(self-directed)  *DocType=All document types; Language=All languages;* |
| #20 | Topic=(oppositional defiant disorder) AND Topic=(self-directed)  *DocType=All document types; Language=All languages;* |
| #19 | Topic=(oppositional defiant disorder) AND Topic=(self-administered)  *DocType=All document types; Language=All languages;* |
| #18 | Topic=(conduct disorder) AND Topic=(internet)  *DocType=All document types; Language=All languages;* |
| #17 | Topic=(conduct disorder) AND Topic=(bibliotherapy)  *DocType=All document types; Language=All languages;* |
| #16 | Topic=(conduct disorder) AND Topic=(parent-administered)  *DocType=All document types; Language=All languages;* |
| #15 | Topic=(conduct disorder) AND Topic=(self-help)  *DocType=All document types; Language=All languages;* |
| #14 | Topic=(conduct disorder) AND Topic=(self-directed)  *DocType=All document types; Language=All languages;* |
| #13 | Topic=(conduct disorder) AND Topic=(self-administered)  *DocType=All document types; Language=All languages;* |
| #12 | Topic=(disruptive behaviour disorder) AND Topic=(internet)  *DocType=All document types; Language=All languages;* |
| #11 | Topic=(disruptive behaviour disorder) AND Topic=(bibliotherapy)  *DocType=All document types; Language=All languages;* |
| #10 | Topic=(disruptive behaviour disorder) AND Topic=(parent-administered)  *DocType=All document types; Language=All languages;* |
| #9 | Topic=(disruptive behaviour disorder) AND Topic=(self-help)  *DocType=All document types; Language=All languages;* |
| #8 | Topic=(disruptive behaviour disorder) AND Topic=(self-directed)  *DocType=All document types; Language=All languages;* |
| #7 | Topic=(disruptive behaviour disorder) AND Topic=(self-administered)  *DocType=All document types; Language=All languages;* |
| #6 | Topic=(attention deficit hyperactivity disorder) AND Topic=(internet)  *DocType=All document types; Language=All languages;* |
| #5 | Topic=(attention deficit hyperactivity disorder) AND Topic=(bibliotherapy)  *DocType=All document types; Language=All languages;* |
| #4 | Topic=(attention deficit hyperactivity disorder) AND Topic=(parent-administered)  *DocType=All document types; Language=All languages;* |
| #3 | Topic=(attention deficit hyperactivity disorder) AND Topic=(self-help)  *DocType=All document types; Language=All languages;* |
| #2 | Topic=(attention deficit hyperactivity disorder) AND Topic=(self-directed)  *DocType=All document types; Language=All languages;* |
| #1 | Topic=(attention deficit hyperactivity disorder) AND Topic=(self-administered)  *DocType=All document types; Language=All languages;* |
